# Supplementary material for: Dyslipidemia in Children Treated with a BRAF Inhibitor for Low-Grade Gliomas: A New Side Effect?
Source: MDPI journal article supplement (doi:10.3390/cancers14112693), 2022-05-29
Supplement: s1 [file s1]

**Supplementary Table S1.** Detailed demographic and clinical features of the patients treated with vemurafenib.

| Pz. N° | Sex | Age at diagnosis | Age at the start of vemurafenib | Tumor site               | Tumor Histology       | Previous treatment (chemo-radiotherapy) |
|--------|-----|------------------|---------------------------------|--------------------------|-----------------------|-----------------------------------------|
| 1      | F   | 0,3              | 4,9                             | hypothalamic /chiasmatic | ganglioglioma         | 4 lines of chemotherapy                 |
| 2      | F   | 1,0              | 2,8                             | hypothalamic /chiasmatic | ganglioglioma         | 2 lines of chemotherapy                 |
| 3      | M   | 3,9              | 9,3                             | hypothalamic /chiasmatic | ganglioglioma         | 3 lines of chemotherapy + RT            |
| 4      | F   | 11,2             | 11,3                            | basal ganglia            | ganglioglioma         | only surgery                            |
| 5      | M   | 13,8             | 18,8                            | spinal cord              | pilocytic astrocytoma | 1 line of chemotherapy                  |
| 6      | M   | 2,8              | 3,5                             | hypothalamic /chiasmatic | pilocytic astrocytoma | 1 line of chemotherapy                  |

**Supplementary Table S2.** Lipid levels before and after switch of treatment from vemurafenib to dabrafenib and trametinib.

| Lipid category    | +1 month Vemur. | +3 months Vemur. | +6 months Vemur. | +12 months Vemur. | +24 months Vemur. | +1 month Dab./Tra. | +3 months Dab./Tra. | +6 months Dab./Tra. |
|-------------------|-----------------|------------------|------------------|-------------------|-------------------|--------------------|---------------------|---------------------|
| Total cholesterol | 206             | 225              | 191              | 215               | 182               | 135                | 163                 | 165                 |
| LDL cholesterol   | 94              | 108              | 70               | 87                | 72                | 50                 | 71                  | 71                  |
| HDL cholesterol   | 94              | 109              | 119              | 129               | 108               | 80                 | 96                  | 88                  |
| Triglycerides     | 78              | 77               | 75               | 52                | 34                | 66                 | 68                  | 59                  |

**Supplementary Table S3.** Fasting blood glucose, biochemical liver and kidney function tests before and during vemurafenib.

| Category                         |                | -1 month Vemur. | +1 month Vemur. | +3 months Vemur. | +6 months Vemur. | +12 months Vemur. | Last follow up |
|----------------------------------|----------------|-----------------|-----------------|------------------|------------------|-------------------|----------------|
| Fasting blood glucose (mg/dL)    | Mean ± SD      | 90.5 ± 4.3      | 86 ± 8.6        | 85.6 ± 4.5       | 86.5 ± 5.9       | 86.8 ± 10.5       | 93 ± 4.5       |
|                                  | Median (range) | 91 (83 – 95)    | 85 (77 – 99)    | 87 (80 – 91)     | 87 (80 – 93)     | 89 (73 – 100)     | 93 (87 – 99)   |
| Aspartate aminotransferase (U/L) | Mean ± SD      | 20.2 ± 4.0      | 29.2 ± 12.4     | 24.4 ± 9.6       | 18.9 ± 3.4       | 21.2 ± 7.1        | 23.5 ± 6.8     |
|                                  | Median (range) | 21 (15 – 25)    | 25 (17 – 50)    | 20 (15 – 39)     | 19 (14 – 24)     | 19 (14 – 33)      | 21 (18 – 36)   |
| Alanine aminotransferase (U/L)   | Mean ± SD      | 16.3 ± 4.5      | 32.6 ± 14.2     | 28.4 ± 14.2      | 16.5 ± 5.3       | 15.3 ± 3.3        | 19.2 ± 6.7     |
|                                  | Median (range) | 16 (13 – 25)    | 38 (17 – 48)    | 23 (11 – 44)     | 16 (9 – 23)      | 16.5 (10 – 19)    | 19 (11 – 30)   |

|            |           |                 |                 |                 |                 |                 |                 |
|------------|-----------|-----------------|-----------------|-----------------|-----------------|-----------------|-----------------|
| Creatinine | Mean + SD | 0.4 ± 0.2       | 0.6 ± 0.3       | 0.6 ± 0.3       | 0.6 ± 0.3       | 0.6 ± 0.2       | 0.6 ± 0.1       |
|            | Median    |                 |                 |                 |                 |                 |                 |
|            | (range)   | 0.2 (0.2 – 0.7) | 0.3 (0.3 – 0.9) | 0.3 (0.3 – 1.0) | 0.4 (0.4 – 1.0) | 0.5 (0.5 – 0.9) | 0.5 (0.4 – 0.8) |
